# Supplementary material for: A hybrid acoustofluidic device with Parafilm® that operates as a traditional bulk acoustic wave or flexural plate wave device
Source: Royal Society of Chemistry journal article supplement (doi:10.1039/d5ra02351c), 2025-01-01
Supplement: d5ra02351c3.pdf [file d5ra02351c3.pdf]

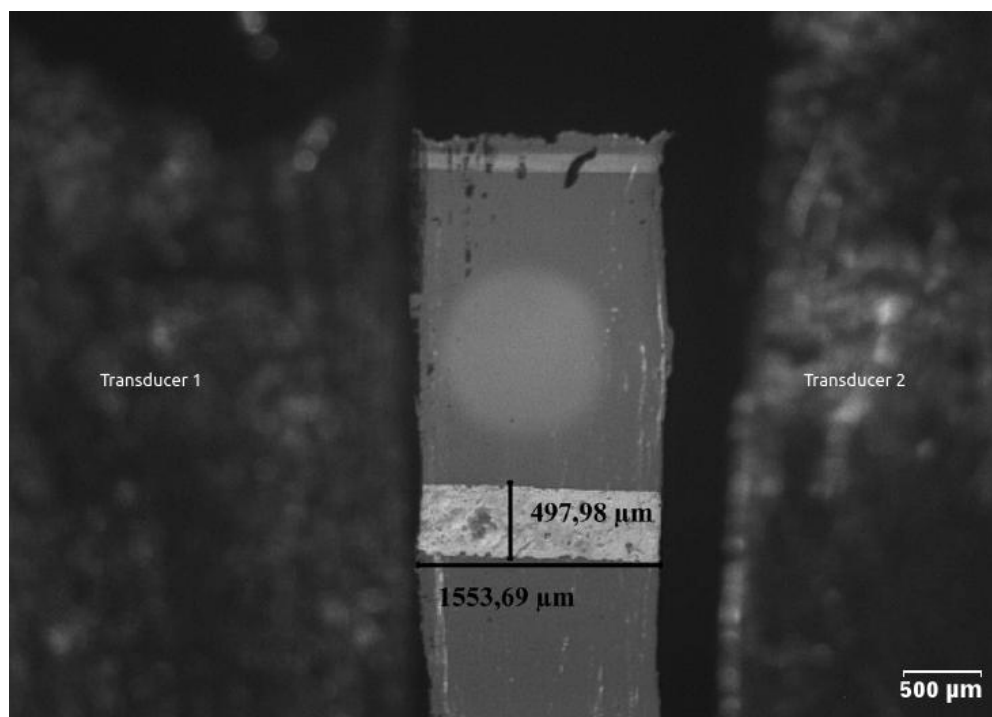

**Figure 1.** Dimensions of channel in HMAD P1||.

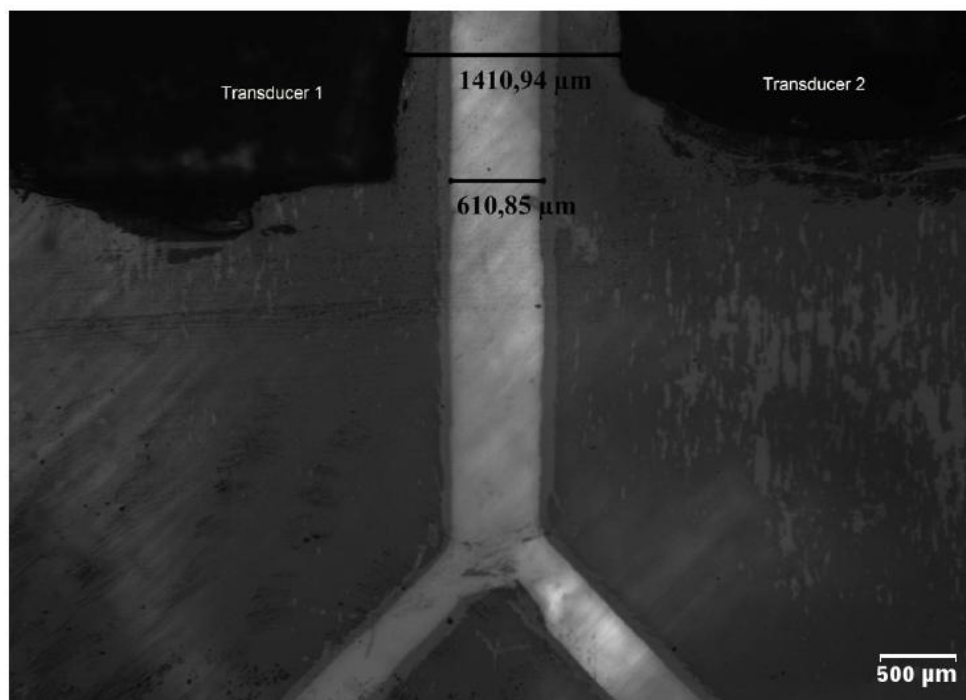

**Figure 2.** Dimensions of channel in HMAD P2||.

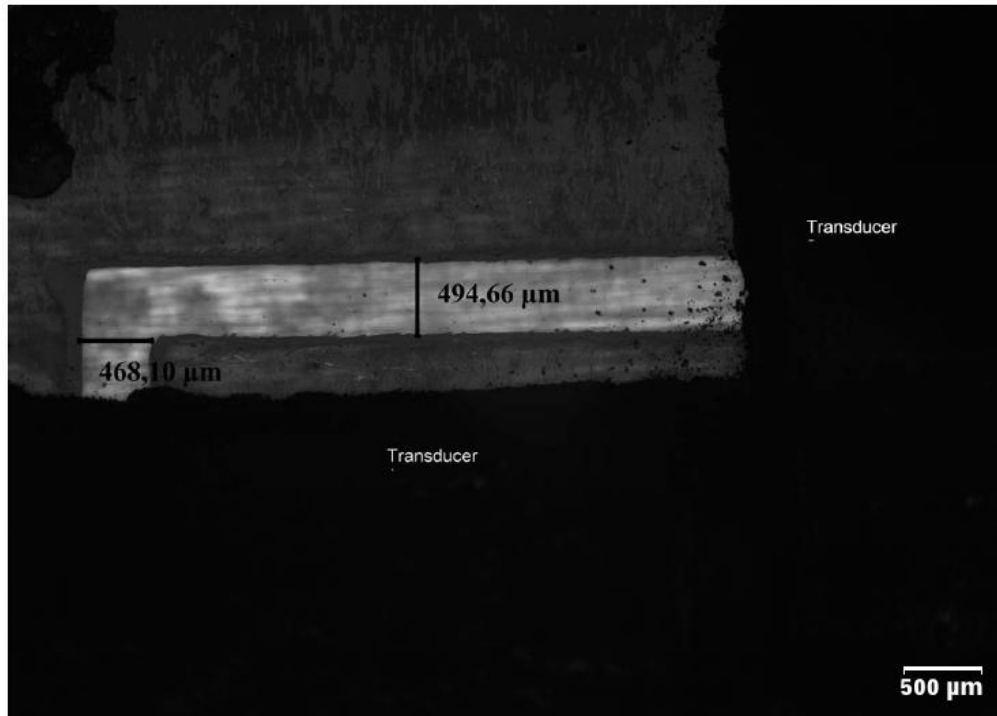

**Figure 3.** Dimensions of channel in HMAD P3 $\perp$ .

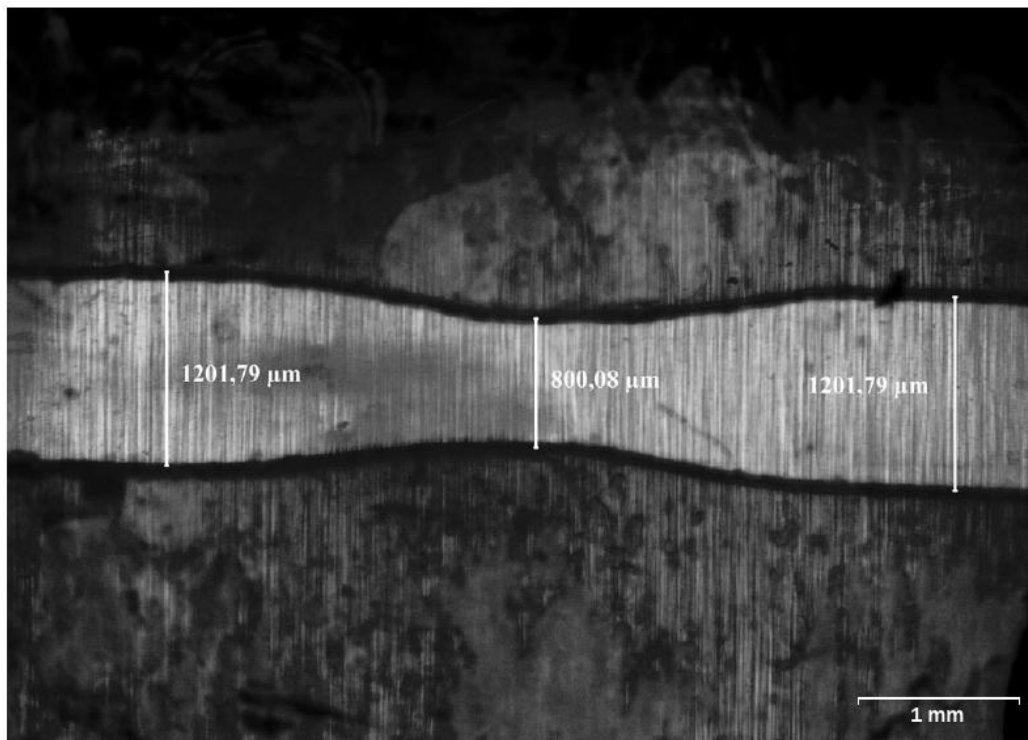

**Figure 4.** Dimensions of channel in HMAD P4 $\parallel$ .

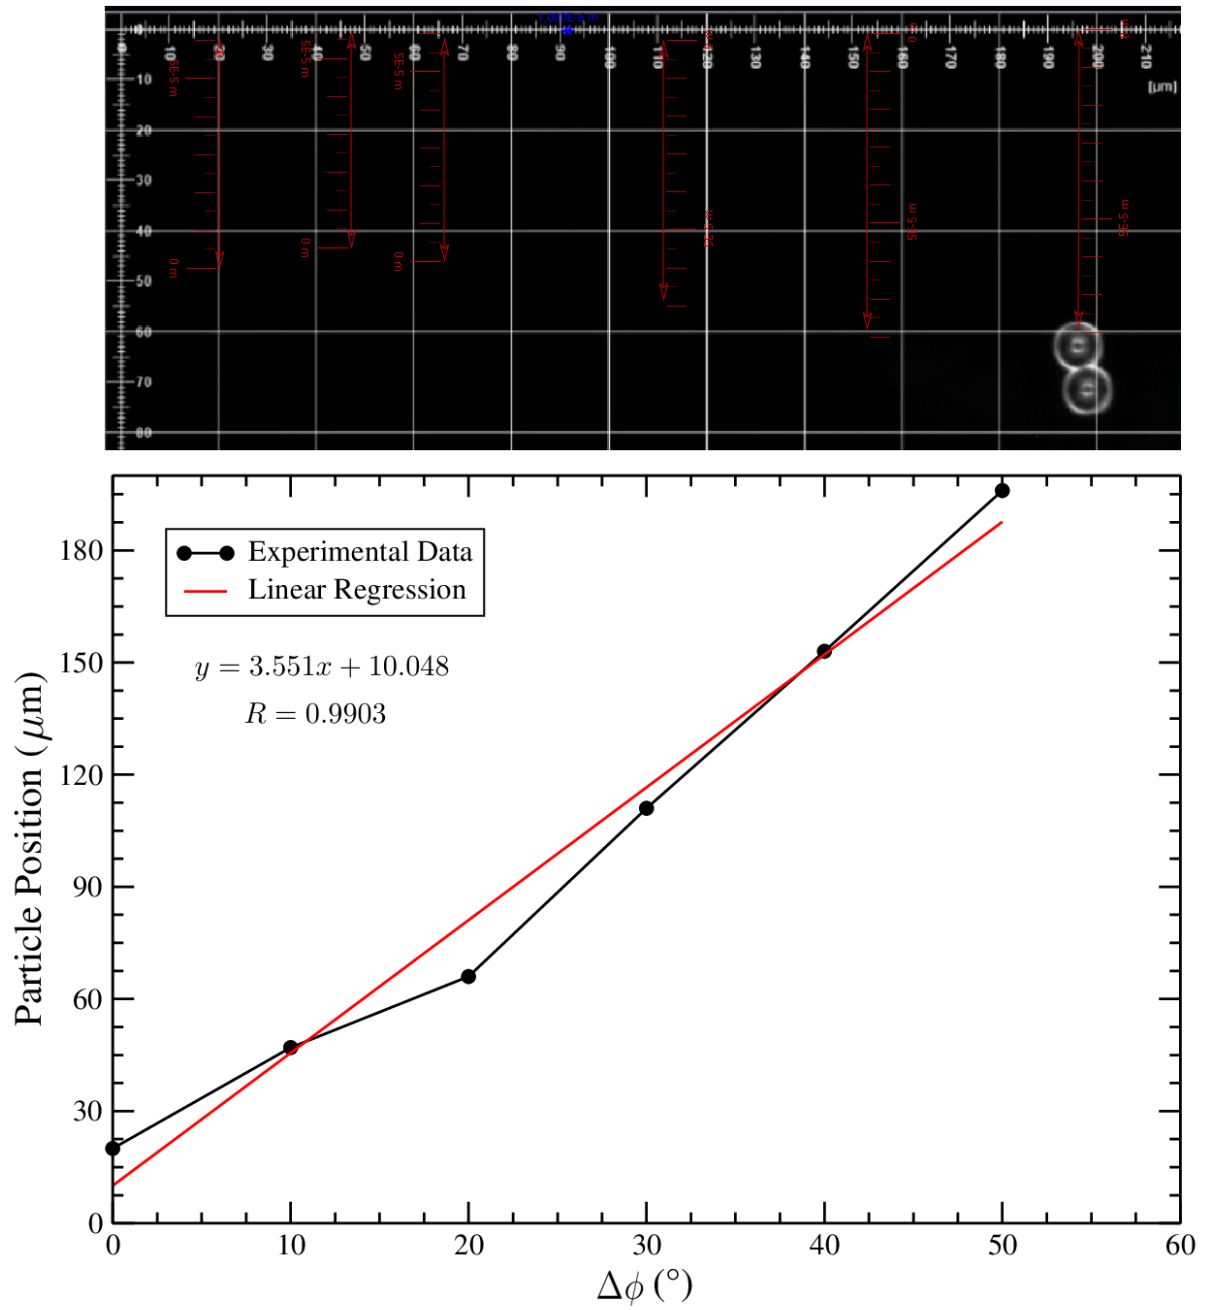

**Figure 5.** Aggregate particles position with respect to the phase difference in HMA D P1|| with piezoelectric ceramic actuators of 2MHz at frequency 1.873MHz. Experimental data obtained from video 8 with Tracker software versión 6.3.1.

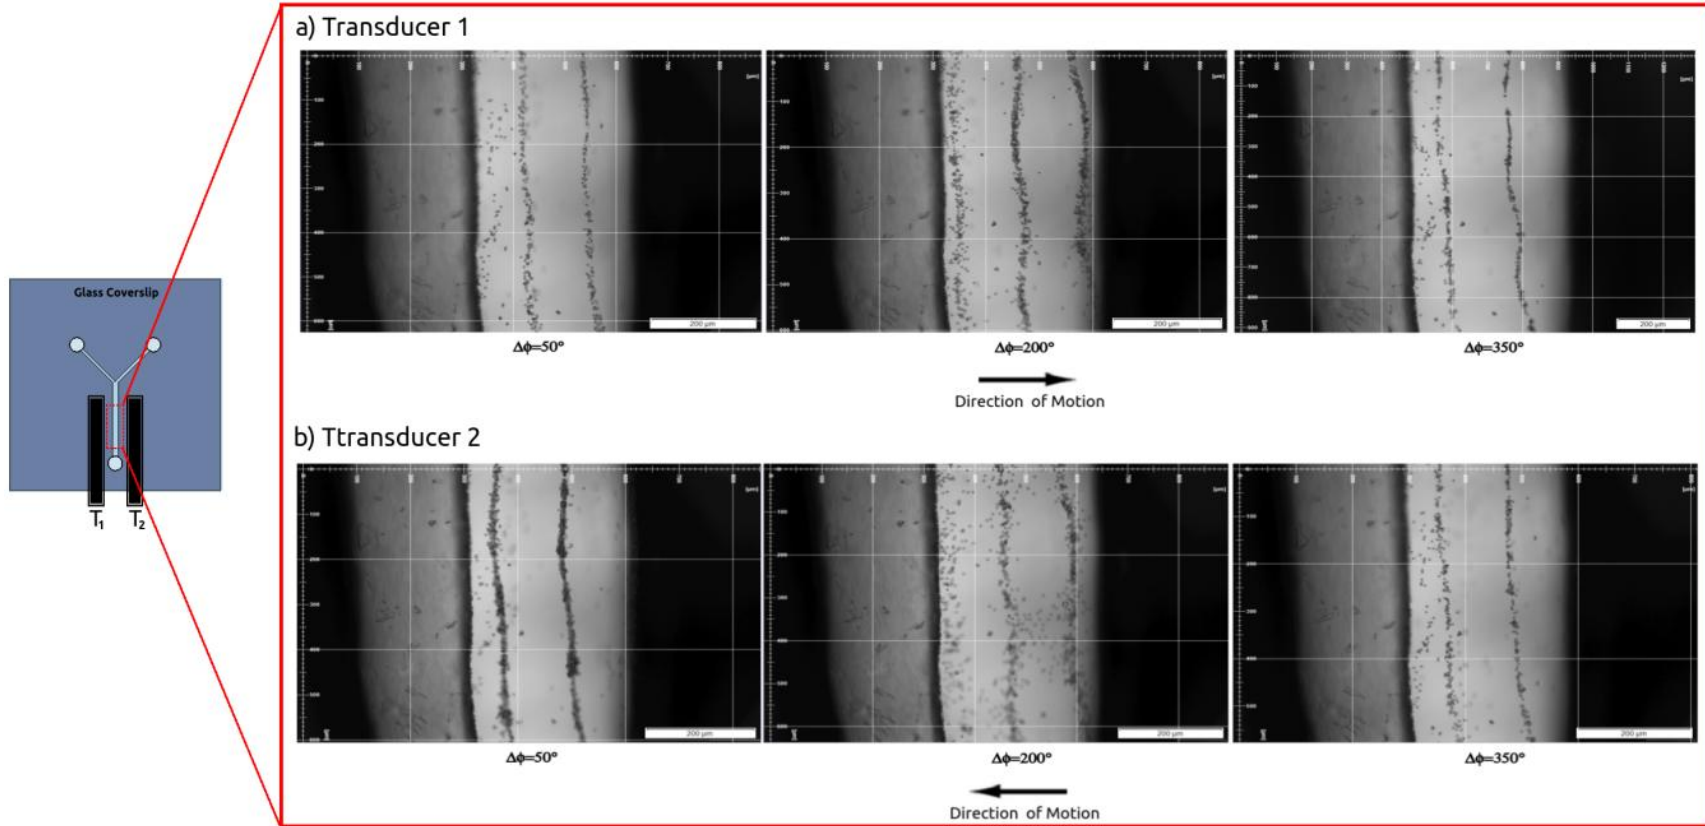

**Figure 6.** Position of the linear aggregates in the HMAD P2|| in the FPW-like mode when the phase in the acoustic wave generated by a) transducer 1 ( $T_1$ ) or b) transducer 2 ( $T_2$ ) is modified. The black arrows indicate the direction in which the aggregates of microparticles move. The resonance was obtained with two piezoelectric ceramic actuators of 5MHz at frequency 4.899 MHz.
